# Supplementary figures and images for: Contamination Sources and Transmission Routes for Campylobacter on (Mixed) Broiler Farms in Belgium, and Comparison of the Gut Microbiota of Flocks Colonized and Uncolonized with Campylobacter
Source: MDPI journal article supplement (doi:10.3390/pathogens10010066), 2021-01-13

Observed taxa

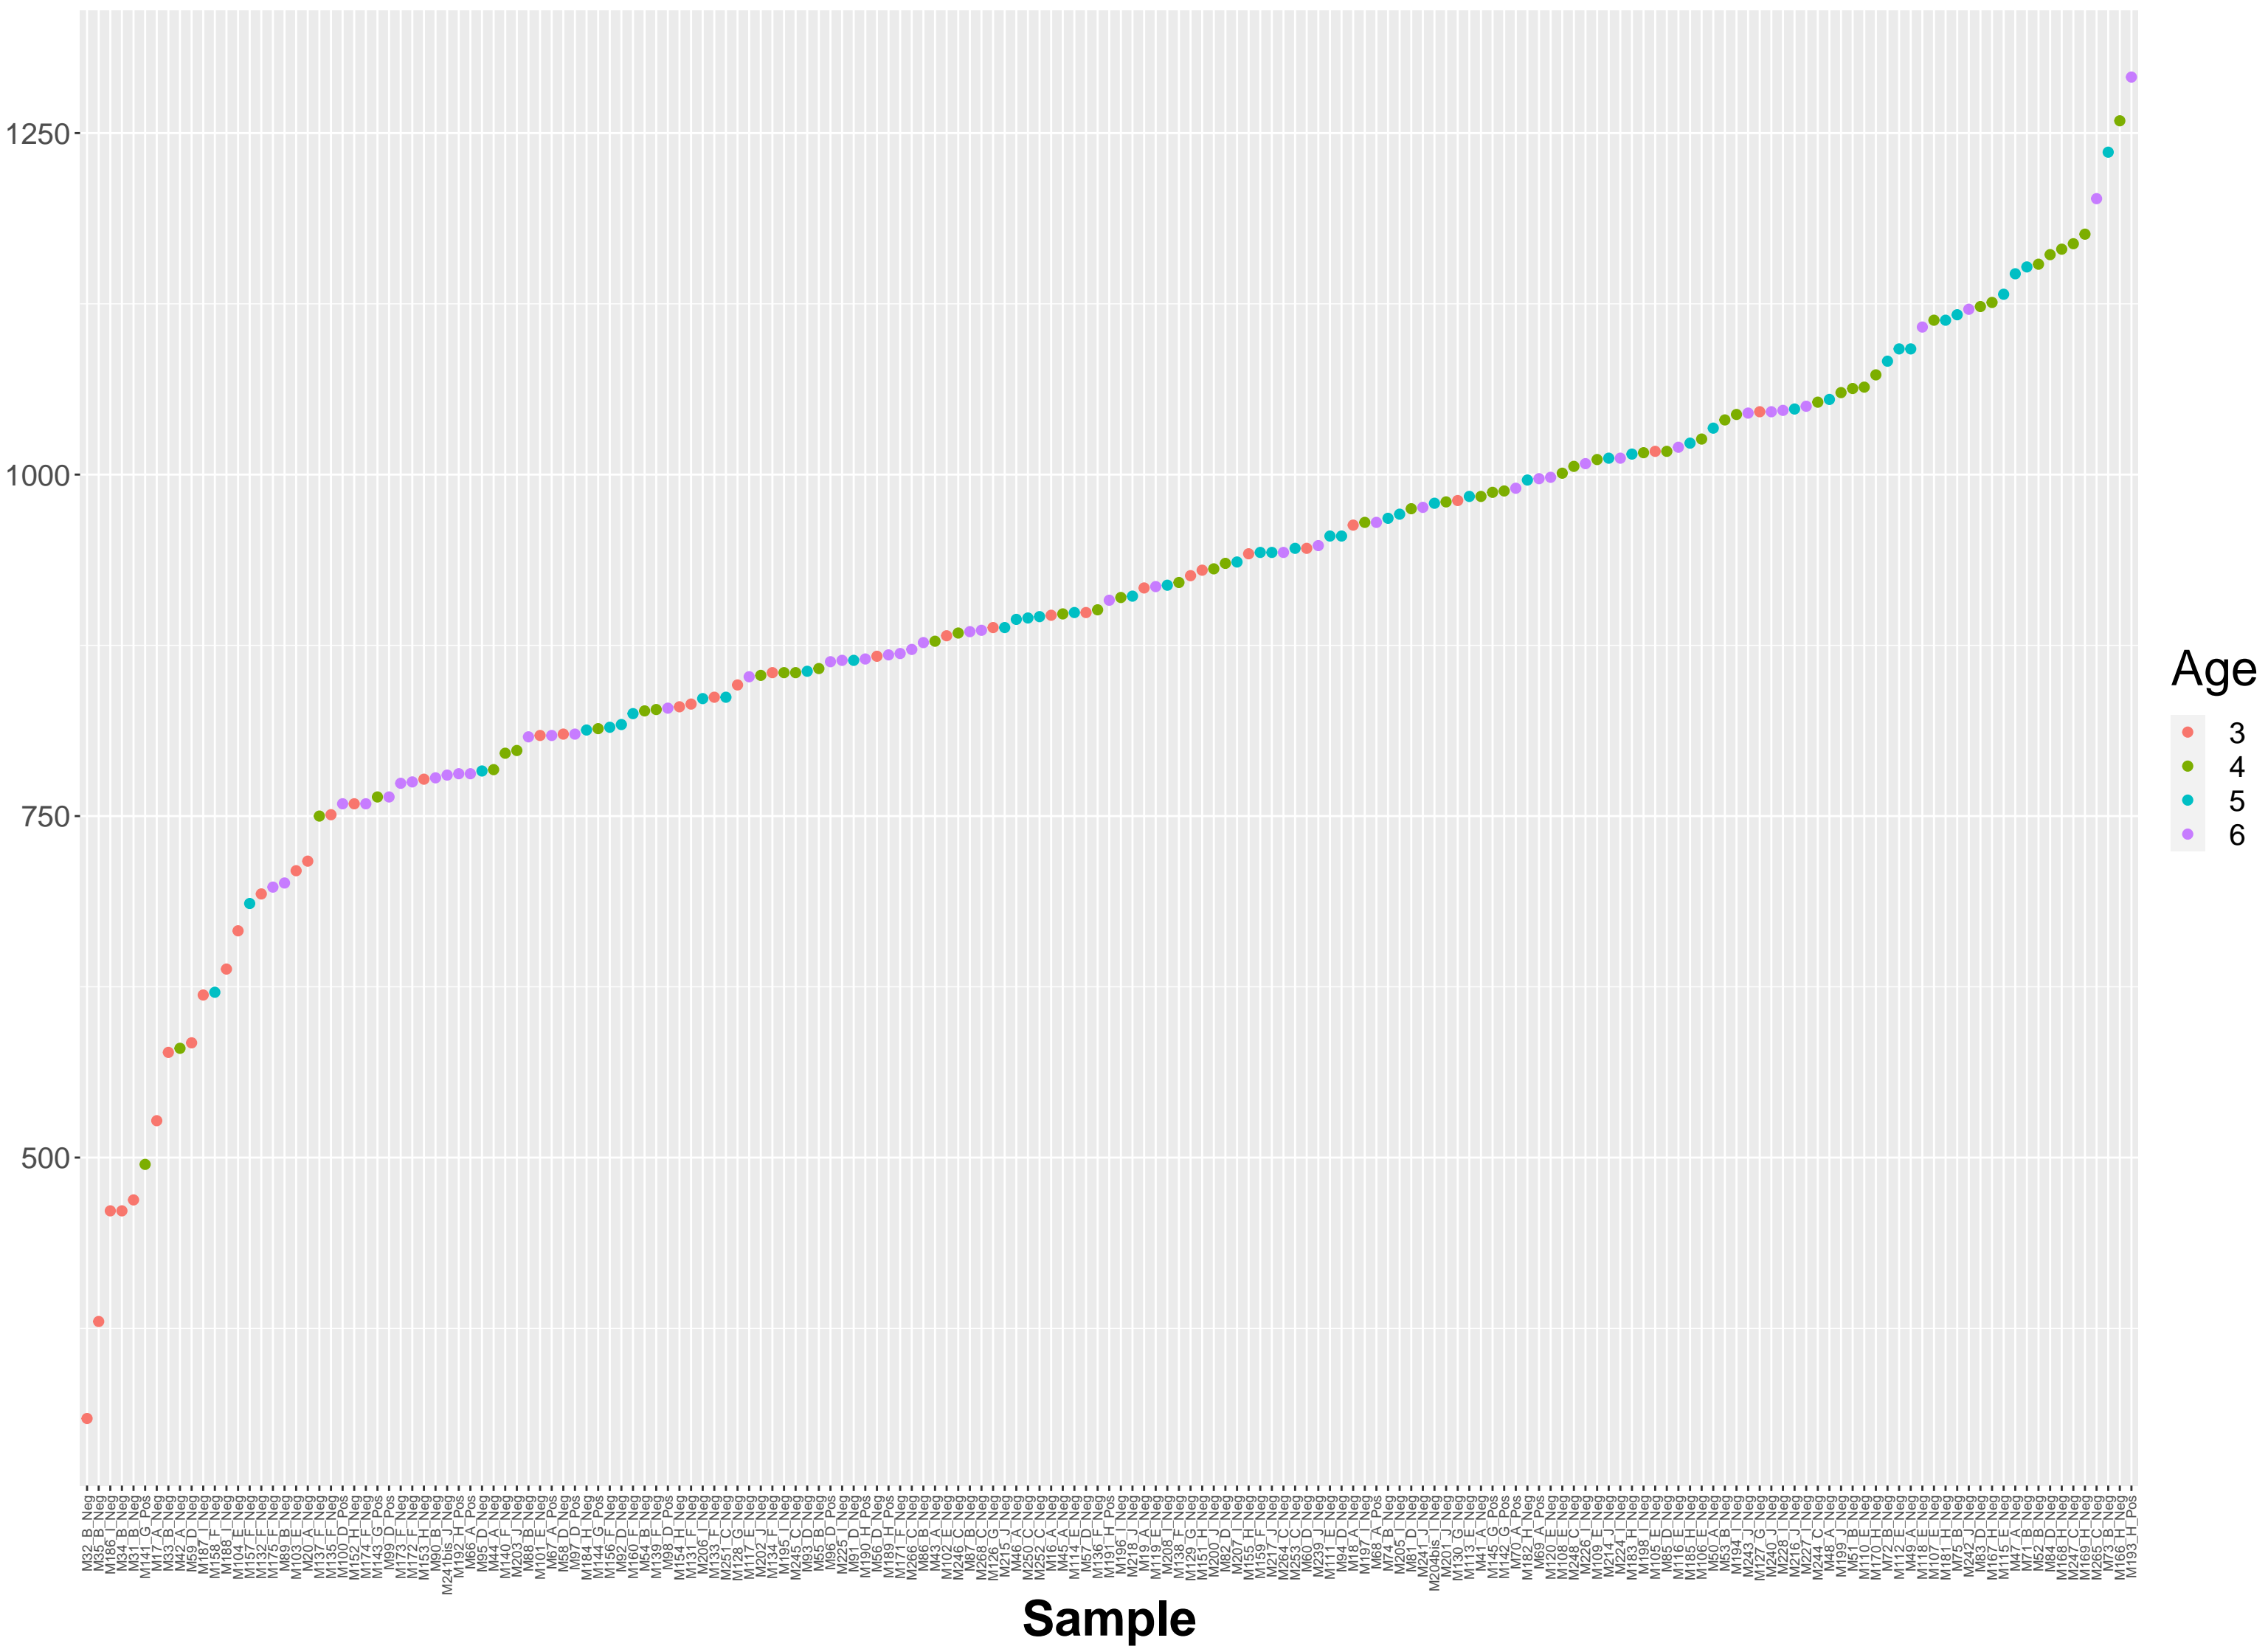

Age

- 3
- 4
- 5
- 6

Sample

Supplement: s1 [file s1]
